# Supplementary material
Source: publisher figshare collection journal article supplement (https://gsajournals.figshare.com/ndownloader/files/14042762)
Supplement: Supplementary file 1 [file 14042762]

**Table S1 Plasmids used in this study**

| <b>Plasmid</b> | <b>Relevant markers</b>                                                                   | <b>Reference</b>         |
|----------------|-------------------------------------------------------------------------------------------|--------------------------|
| JCB16          | pFA6a- <i>KanMX6</i>                                                                      | Longtine et. al (1998)   |
| JCB31          | pBG1805- <i>TPK2</i> (Gal1 promoter C-terminus 6XHIS-HA-3C-ZZ tag), 2 $\mu$ m <i>URA3</i> | Gelperin et al (2005)    |
| JCB53          | pFA6a- <i>HBH-hphMX4</i>                                                                  | Tagwerker et. al (2006)  |
| JCB58          | <i>TPK1</i> in YEplac195, 2 $\mu$ m <i>URA3</i>                                           | Pan et. al (1999)        |
| JCB59          | <i>TPK2</i> in YEplac195, 2 $\mu$ m <i>URA3</i>                                           | Pan et. al (1999)        |
| JCB60          | <i>TPK3</i> in YEplac195, 2 $\mu$ m <i>URA3</i>                                           | Pan et. al (1999)        |
| JCB63          | pRS426, 2 $\mu$ m <i>URA3</i>                                                             | Christiansonet.al (1992) |
| JCB65          | <i>TA::MX4-natR</i> switcher cassette                                                     | A. Tong et. al (2005)    |
| JCB83          | pFA6a- <i>GFP(S65T)-His3MX6</i>                                                           | Longtine et. al (1998)   |
| JCB153         | <i>pGAL1-GST-TPK2</i> (K99R) in YEplac195                                                 | Pan et. al (2002)        |
| JCB155         | pC4- DASH Complex ( <i>Spc34-6XHIS</i> )                                                  | Gestaut et. al (2008)    |
| JCB352         | <i>pHIS3p:mTurquoise2-Tub1+3' UTR::LEU2</i>                                               | Markus et. al (2015)     |

**Table S2 Yeast strains used in this study**

| Strain             | Relevant genotype                                                                                                    | Source or reference     |
|--------------------|----------------------------------------------------------------------------------------------------------------------|-------------------------|
| JCY91 <sup>‡</sup> | MATa <i>his3Δ1 leu2Δ0 met15Δ0 ura3Δ0</i>                                                                             | Brachmann et al. (1998) |
| JCY124             | Same as JCY91, <i>dam1-1::KanMX<sup>±</sup></i>                                                                      | Li et al. (2011)        |
| JCY125             | Same as JCY91, <i>dam1-11::KanMX</i>                                                                                 | Li et al. (2011)        |
| JCY507*            | MATα <i>DAM1-GFP::kanMX</i>                                                                                          | Mark Winey              |
| JCY534             | MATα <i>ura3-52 lys2-801 ade2-101 trp1Δ63 his3Δ200 leu2Δ1CFIII (CEN3L.YPH278) HIS3 SUP11</i>                         | Philip Hieter           |
| JCY575             | Same as JCY91, <i>dam1-1S257A::KanMX</i>                                                                             | This Study              |
| JCY588             | MATa/ <i>αpep4::HIS3/pep4::HIS3prb1Δ1.6R/prb1Δ1.6R can1/can1ura3-52/ura3-52 his3Δ200/his3Δ200 GAL1-GST-TPK2/TPK2</i> | Joseph Heitman          |
| JCY611             | Same as JCY534, <i>dam1-S31D::KanMX</i>                                                                              | This Study              |
| JCY612             | Same as JCY534, <i>dam1-S31D::KanMX</i>                                                                              | This Study              |
| JCY613             | Same as JCY534, <i>dam1-S31D::KanMX</i>                                                                              | This Study              |
| JCY986             | Same as JCY91, <i>DAM1-HBH::HphMX4</i>                                                                               | This Study              |
| JCY988             | Same as JCY91, <i>dam1-S31A-HBH::HphMX4</i>                                                                          | This Study              |
| JCY990             | Same as JCY91, <i>dam1-S31A-GFP(S65T)::HIS3MX6</i>                                                                   | This Study              |
| JCY992             | Same as JCY91, <i>dam1-S31D-GFP(S65T)::HISMX6</i>                                                                    | This Study              |
| JCY994             | Same as JCY91, <i>dam1-S31A::KanMX</i>                                                                               | This Study              |
| JCY995             | Same as JCY91, <i>dam1-S31A::NatMX</i>                                                                               | This Study              |
| JCY996             | Same as JCY91, <i>dam1-S31D::KanMX</i>                                                                               | This Study              |
| JCY997             | Same as JCY91, <i>dam1-S31D::KanMX</i>                                                                               | This Study              |
| JCY998             | Same as JCY91, <i>dam1-1S31A::KanMX</i>                                                                              | This Study              |
| JCY999             | Same as JCY91, <i>dam1-1S31D::KanMX</i>                                                                              | This Study              |

|         |                                                                                       |             |
|---------|---------------------------------------------------------------------------------------|-------------|
| JCY1000 | Same as JCY534, <i>dam1-S31A::KanMX</i>                                               | This Study  |
| JCY1033 | Same as JCY91, <i>dam1-S20DS31D::KanMX</i>                                            | This Study  |
| JCY1034 | <i>bal1::LEU2 ARG+ ura3 ade1 his2 trp1 GFP-TUB1::URA3, SPC110-mCherry::hphMX</i>      | M. Gardener |
| JCY1035 | Same as JCY91, <i>Dam1-GFP(S65T)::HIS3MX6, TUB1-Turquoise (TUB1 3'UTR::LEU2)</i>      | This Study  |
| JCY1036 | Same as JCY91, <i>dam1-S31A-GFP(S65T)::HIS3MX6, TUB1-Turquoise (TUB1 3'UTR::LEU2)</i> | This Study  |
| JCY1037 | Same as JCY91, <i>dam1-S31D-GFP(S65T)::HIS3MX6, TUB1-Turquoise (TUB1 3'UTR::LEU2)</i> | This Study  |
| JCY1038 | Same as JCY91, <i>dam1-1::KanMX, TUB1-Turquoise (TUB1 3'UTR::LEU2)</i>                | This Study  |
| JCY1039 | Same as JCY91, <i>dam1-1S31A::KanMX, TUB1-Turquoise (TUB1 3'UTR::LEU2)</i>            | This Study  |
| JCY1040 | Same as JCY91, <i>dam1-1S31D::KanMX, TUB1-Turquoise (TUB1 3'UTR::LEU2)</i>            | This Study  |
| JCY1041 | Same as JCY91, <i>Dam1-GFP(S65T)::HIS3MX6, SPC110-mCherry::hphMX</i>                  | This Study  |
| JCY1042 | Same as JCY91, <i>dam1-S31A-GFP(S65T)::HIS3MX6, SPC110-mCherry::hphMX</i>             | This Study  |
| JCY1043 | Same as JCY91, <i>dam1-S31D-GFP(S65T)::HIS3MX6, SPC110-mCherry::hphMX</i>             | This Study  |
| JCY1044 | Same as JCY91, <i>dam1-S20DS31D-GFP(S65T)::HIS3MX6</i>                                | This Study  |
| JCY1045 | Same as JCY91, <i>dam1-S20DS31D-GFP(S65T)::HIS3MX6, SPC110-mCherry::hphMX</i>         | This Study  |

---

‡ Derived from S288C

\*Made in S228C background

± *dam1-1* C111Y, Q61R, E160K

**Table S3 Oligonucleotides used in this study**

| Primer | Sequence                                                                                            | Description                                                                                                          |
|--------|-----------------------------------------------------------------------------------------------------|----------------------------------------------------------------------------------------------------------------------|
| JCO53  | CTGCAGCGAGGAGCCGTAAT                                                                                | Reverse primer, binds to the TEF promoter region                                                                     |
| JCO64  | GCGTATAAGCTCAGCAATTGCACC                                                                            | Forward primer, 64bp upstream of <i>DAM1</i> start codon                                                             |
| JCO65  | CCGTTGTCCAGTTTCTTGTCAATTTGG                                                                         | Reverse primer, 381bp downstream of <i>DAM1</i> stop codon                                                           |
| JCO76  | AGCCCTCCAAGATAGGCAACAAC                                                                             | Forward primer, 586bp downstream of <i>DAM1</i> start codon                                                          |
| JCO89  | ACAGTAACTGAGAAGAAAGGCCATCTTACATA<br>CAATCAGA                                                        | Forward primer of <i>DAM1</i> that has a point mutation for S257A                                                    |
| JCO127 | CTGTTGCAAAGAAAAGTGAATAAATA<br>CAAGGCCCCCTTCAGA cggatccccgggtaattaa                                  | Forward primer of <i>DAM1</i> that also contains flanking sequence of pFA6a plasmid                                  |
| JCO128 | TAGCGATATATTTTGTGAGGAGGATAATTCTTT<br>GGTTGGGTTGGGCGTAG gaattcgagctcgtttaa                           | Reverse primer of <i>DAM1</i> that also contains flanking sequence of pFA6a vector                                   |
| JCO130 | GACCACAAGGTCTGCCACGGAATATCGTTTAT<br>CCATTGGTAGCGCTCCGACTTCTAGAAGGTCTG<br>GCTATGGGTGAATCCTCATCCCTGAT | Forward primer of <i>DAM1</i> that has a point mutation for S31A and a silent mutation making XbaI restriction site  |
| JCO147 | GACCACAAGGTCTGCCACGGAATATCGTTTAT<br>CCATTGGTAGCGCTCCGACTTCTAGAAGGTCTG<br>GATATGGGTGAATCCTCATCCCTGAT | Forward primer of <i>DAM1</i> that has a point mutation for S31D and a silent mutation making XbaI restriction site  |
| JCO154 | CTTTCTTCCTCCTTTTGCTTTAACCGTTGTCCA<br>GTTTCTTGTCAATTTGGGAATTCGAGCTCGTTT<br>AAAC                      | Reverse primer of <i>DAM1</i> that has flanking sequence of pFA6a vector. It binds to 401bp downstream of stop codon |
| JCO245 | CTGCCACGGAATATCGATTAGCCATTGGTAGC<br>GCTCCGACTTC                                                     | Forward primer of <i>DAM1</i> that has a point mutation for S20A and a silent mutation making ClaI restriction site  |
| JCO246 | CTGCCACGGAATATCGATTAGACATTGGTAGC<br>GCTCCGACTTC                                                     | Forward primer of <i>DAM1</i> that has a point mutation for S20D and a silent mutation making ClaI restriction site  |

JCO269 TAGATAGTGTGAGCTCCTTGTAGAC

Forward primer, 240bp upstream of  
*SPC110* start codon

JCO270 CTAGGGAGATTAGCACACTACAATC

Reverse primer, 157bp downstream of  
*SPC110* stop codon

**Table S4 Mass spectrometry analysis of *in vitro* kinase reactions with TPKs and the Dam1 complex**

**TPK1**

|                                             | S20        | S31         | S257        | S265     | S292      |
|---------------------------------------------|------------|-------------|-------------|----------|-----------|
| Sum of area for all peptides                | 1163353647 | 473827230   | 692964114   | 35434359 | 850317047 |
| Sum of area for all phosphorylated peptides | 4416337    | 189476867   | 680729723   | 326215   | 0         |
| % Phosphorylated peptides                   | 0.38       | <b>39.9</b> | <b>98.2</b> | 0.92     | 0         |

**TPK2**

|                                             | S20       | S31         | S257        | S265    | S292      |
|---------------------------------------------|-----------|-------------|-------------|---------|-----------|
| Sum of area for all peptides                | 956148127 | 459557535   | 511556947   | 7149586 | 743184641 |
| Sum of area for all phosphorylated peptides | 2316054   | 139153211   | 478776059   | 93598   | 0         |
| % Phosphorylated peptides                   | 0.24      | <b>30.3</b> | <b>93.6</b> | 0.31    | 0         |

**No Kinase**

|                                             | S20       | S31       | S257      | S265    | S292      |
|---------------------------------------------|-----------|-----------|-----------|---------|-----------|
| Sum of area for all peptides                | 956936102 | 648129051 | 859270598 | 2213956 | 912500283 |
| Sum of area for all phosphorylated peptides | 224169    | 68557     | 2193516   | 0       | 0         |
| % Phosphorylated peptides                   | 0.02      | 0.01      | 0.26      | 0       | 0         |

Peptides analyzed are those that contain the indicated serines. Area = ion current chromatographic peak area.

**Figure S1**

**A**

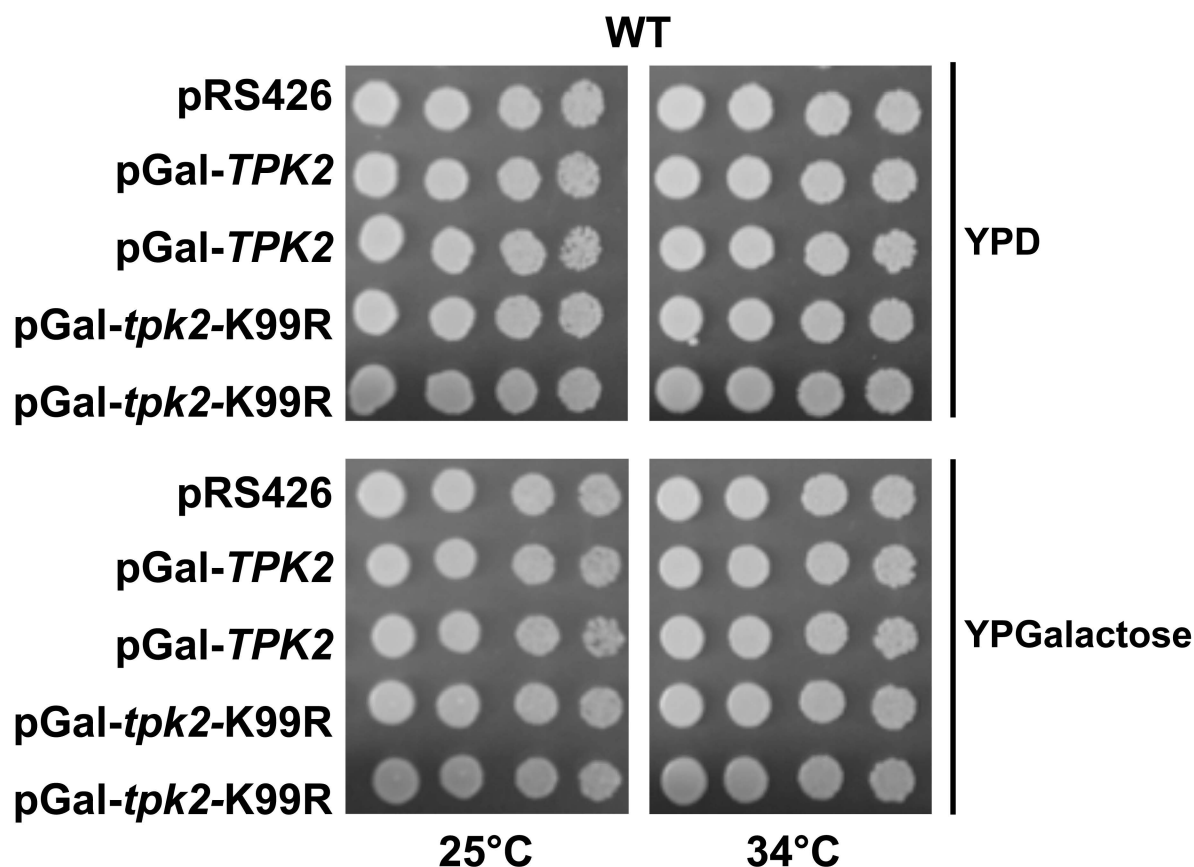

**B**

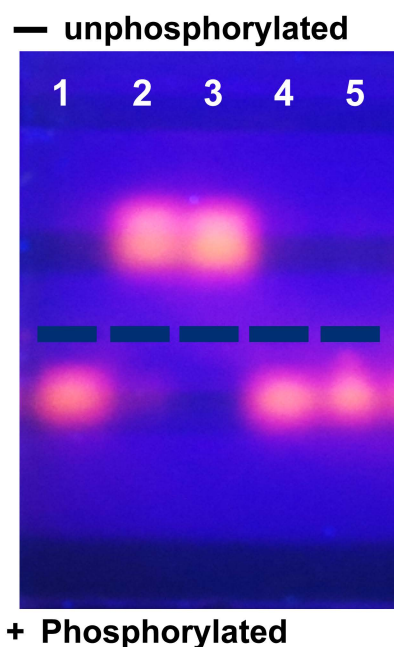

Lane 1- **Positive Control (Bovine PKA)**  
 Lane 2- **Bovine PKA + H-89 (PKA inhibitor)**  
 Lane 3- **Negative Control**  
 Lane 4- **Gal-GST-Tpk1p**  
 Lane 5- **Gal-GST-Tpk2p**

Figure S1. Wild-type cells do not display growth defects when *TPK2* is overexpressed and GST-Tpks purified from yeast are highly active. (A) BY4741 (WT) cells carrying empty vector (pRS426) or wild-type *TPK2* (JCB31) or a catalytically inactive *tpk2*-K99R mutant under the control of a galactose inducible promoter (JCB153). Serial five-fold dilutions of the indicated strains were spotted on YP 2% glucose (YPD) or YP 2% galactose (YPG) at 25°C and 34°C. Cells were grown for 4 days and imaged. (B) Measuring PKA activity of purified GST-Tpk1p and GST-Tpk2p using a PepTag kinase assay. Cells carrying GST-Tpk1p and GST-Tpk2p under the control of a galactose inducible promoter were grown overnight in YPRaffinose. Next day fresh cultures were started and induced with YPGalactose. Whole cell extracts were prepared followed by affinity purification of GST-Tpk1p and GST-Tpk2p with glutathione beads. Bovine PKA was used as a positive control. H-89 and reactions without any kinase were used as negative controls.

Figure S2

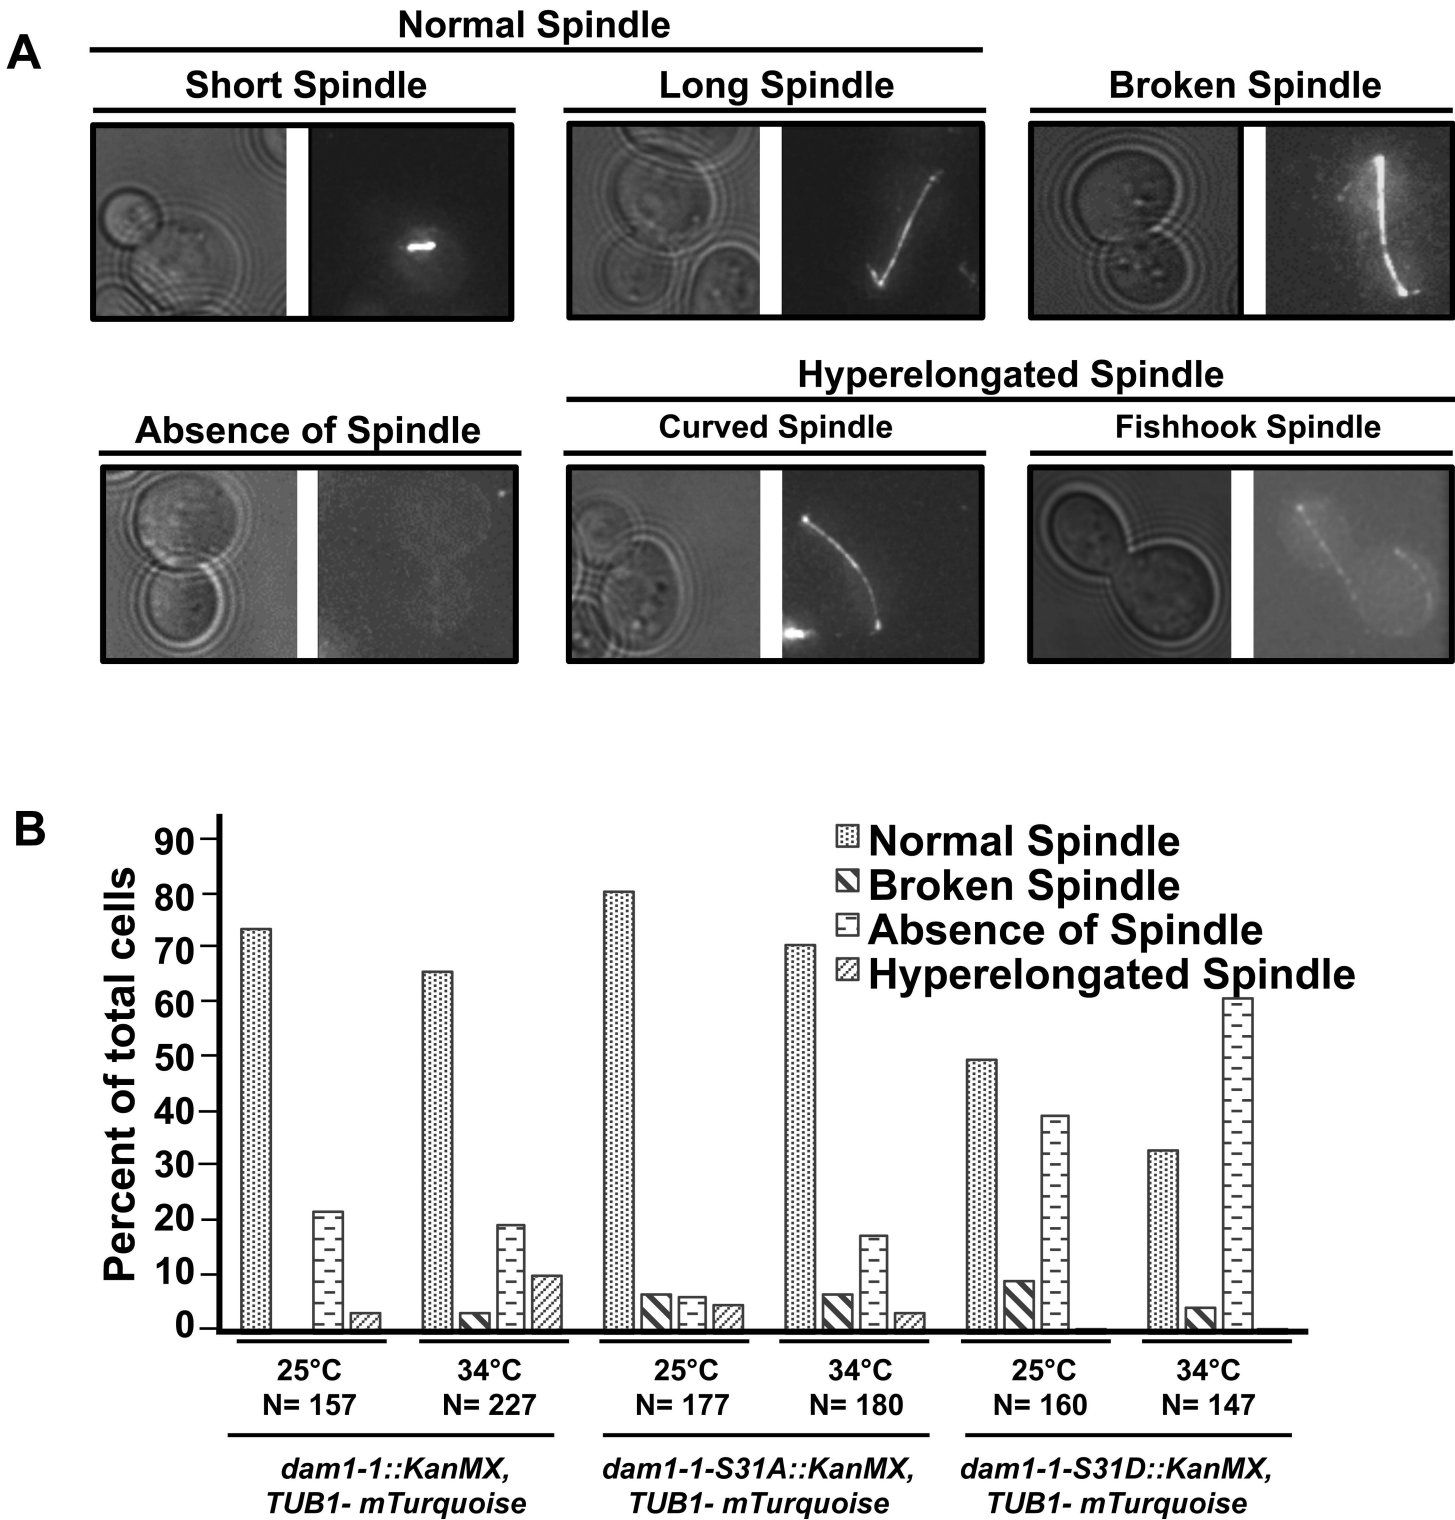

Figure S2. Phospho-mimetic *dam1-1-S31D* mutant is associated with increased defects in spindle morphology. (A) *dam1-1*, *TUB1-mTurquoise* (JCY1038), *dam1-1-S31A*, *TUB1-mTurquoise* (JCY1039) and *dam1-1-S31D*, *TUB1-mTurquoise* (JCY1040) were freshly grown in SC media from a 1:10 dilution of overnight cultures either at 25°C or 34°C for ~ 4 hr. Z-stacks were taken with a DeltaVision Elite microscope as described in methods. Cells were analyzed based upon four major categories which include (1) normal spindle (either short or long spindles), (2) broken spindle, (3) absence of spindle and (4) hyperelongated spindle (either curved spindle or fishhook spindle). (B) Percent of cells in different categories are plotted. Number of cells counted are indicated by (N).



Figure S3

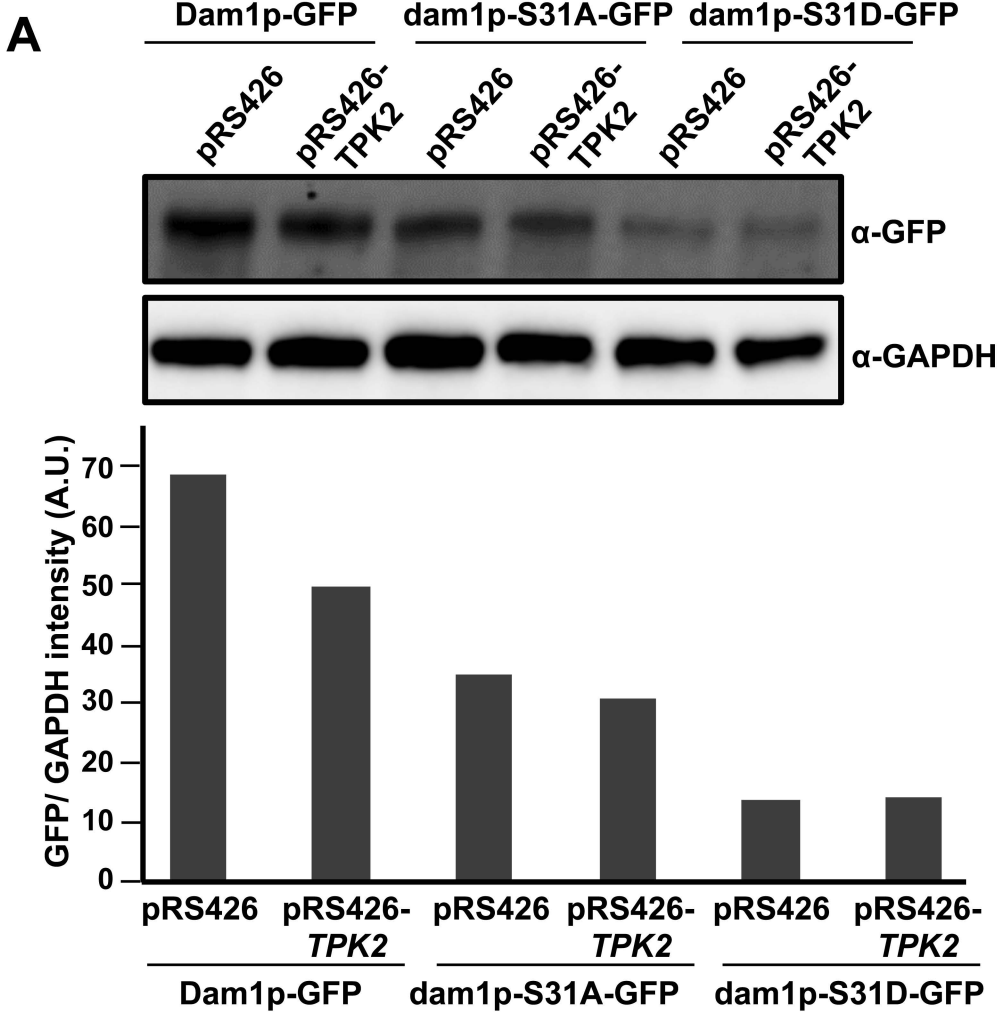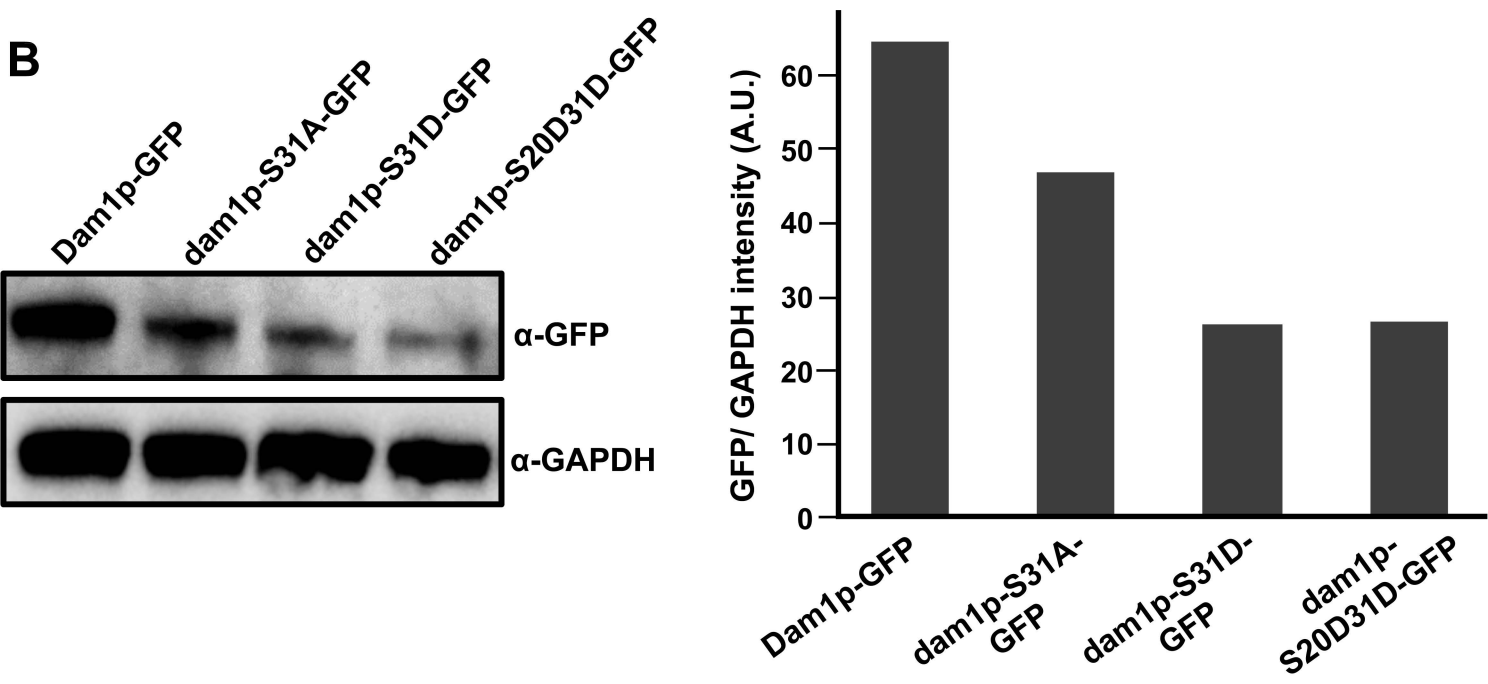

Figure S3. Western analysis of total wild-type Dam1p-GFP and Dam1p-GFP phospho-mutants. Whole cell extracts from the following strains were run on SDS-PAGE and blotted for total GFP and GAPDH: (A) *Dam1*-GFP (JCY507), *dam1*-S31A (JCY990), *dam1*-S31D (JCY992) carrying empty vector pRS426 or pRS426-*TPK2*. (B) *Dam1*-GFP (JCY507), *dam1*-S31A (JCY990), *dam1*-S31D (JCY992), and *dam1*-S20DS31D (JCY1045). Blots were subjected to analysis by ImageJ software to quantify GFP and GAPDH levels and the ratio of GFP/GAPDH intensity plotted (A and B, right). Note that levels of *dam1*p-31D-GFP and *dam1*p-20D31D-GFP mutants are strongly reduced and *dam1*p-S31A-GFP is also reduced but to a lesser extent, compare to wild-type *Dam1*p-GFP.

**Figure S4**

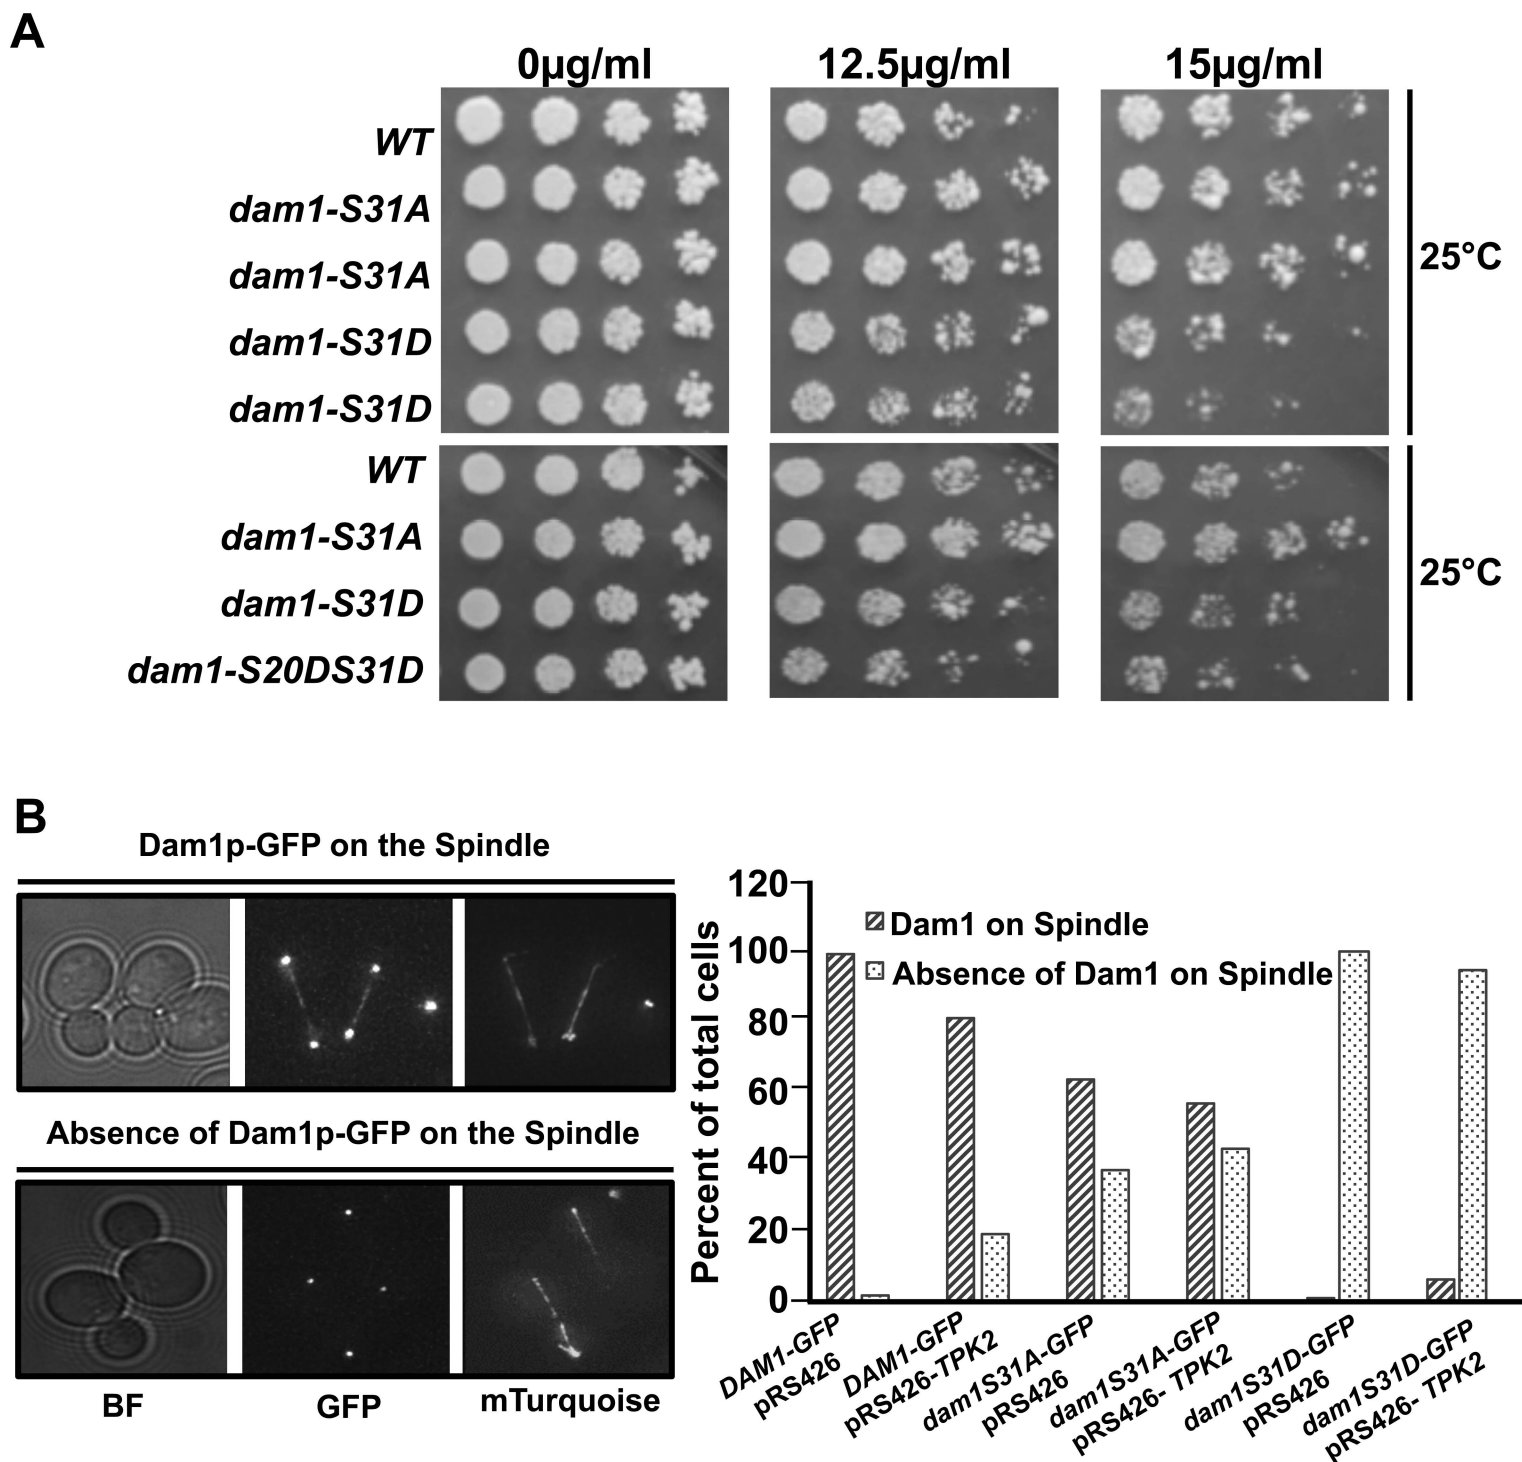

Figure S4. Sensitivity to benomyl and localization of Dam1p to spindle microtubules. (A) The double phospho-mimetic mutant *dam1-S20D31D* (JCY1033) displays greater sensitivity to benomyl compared to wild-type (JCY91) or *dam1-S31A* (JCY994, JCY995) cells but behaves similarly to the phospho-mimetic *dam1-S31D* (JCY996, JCY997) cells. Five-fold serial dilutions of the indicated strains were spotted onto YPD plates with or without benomyl at the indicated concentrations and incubated at 25°C for 3-4 days. (B) Dam1p-GFP is localized to spindles and when high copy *TPK2* is present, there is a reduction of spindle localization. In contrast, Dam1p spindle localization is strongly reduced in the phospho-mimetic *dam1p-S31D* and in to a lesser extent in the non-phosphorylatable *dam1p-S31A* mutant. Indicated strains were freshly grown in SC-URA media with or without *TPK2* for 4hr at 34°C. Images were taken with DeltaVision Elite microscope as described in methods. GFP colocalization with mTurquoise labeled spindles were counted as Dam1p on the spindle. BF = bright field, GFP = green fluorescent protein
